# Supplementary material
Source: PubMed Central journal article supplement (PMC2816614)
Supplement: ddp556_1.pdf [file ddp556_1.pdf]

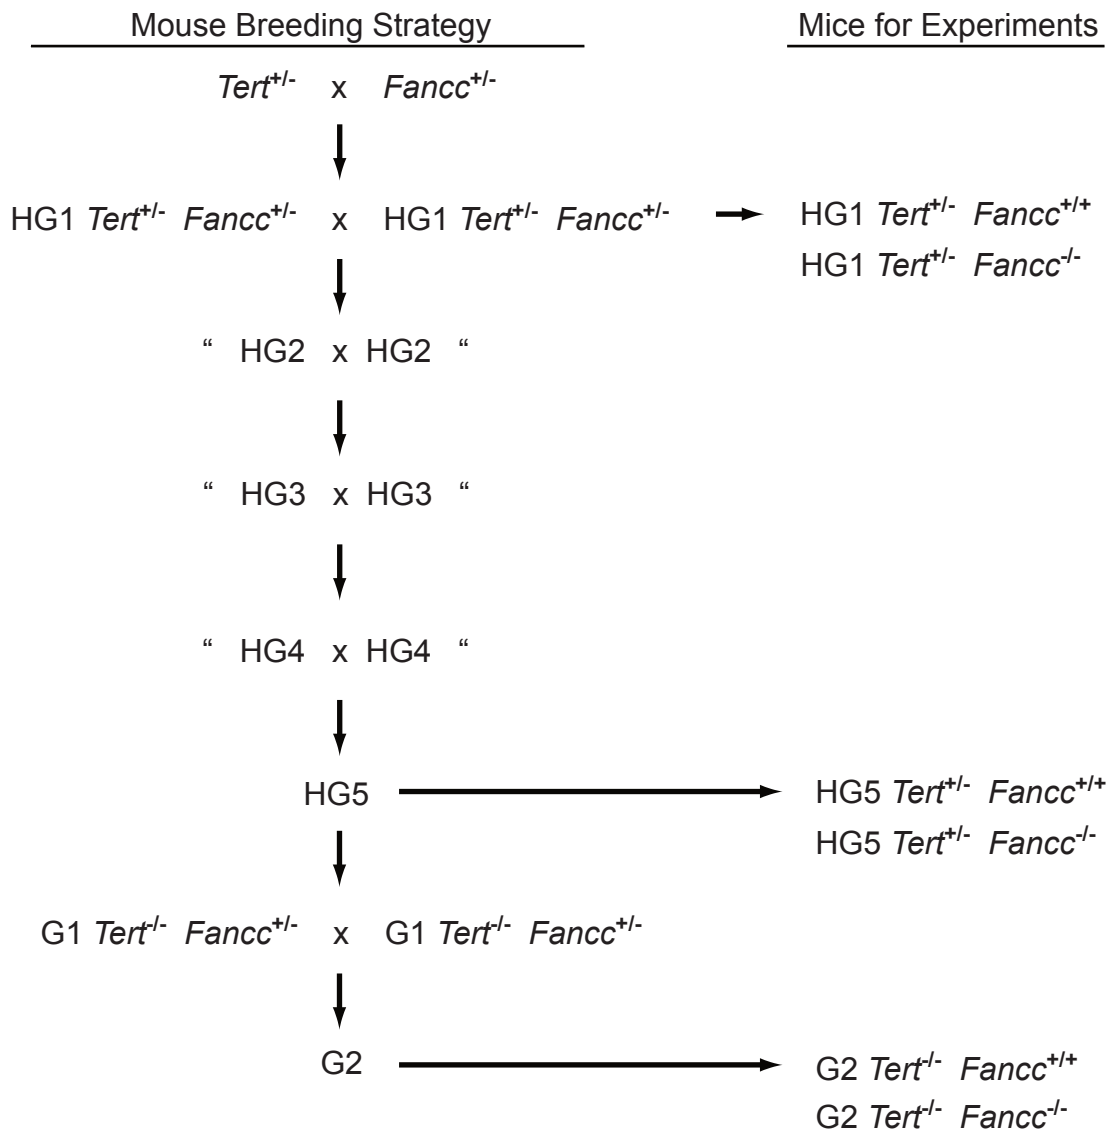

**Figure S1. A schematic representation of mouse breeding strategy for different generation *Tert* mutant mice.**

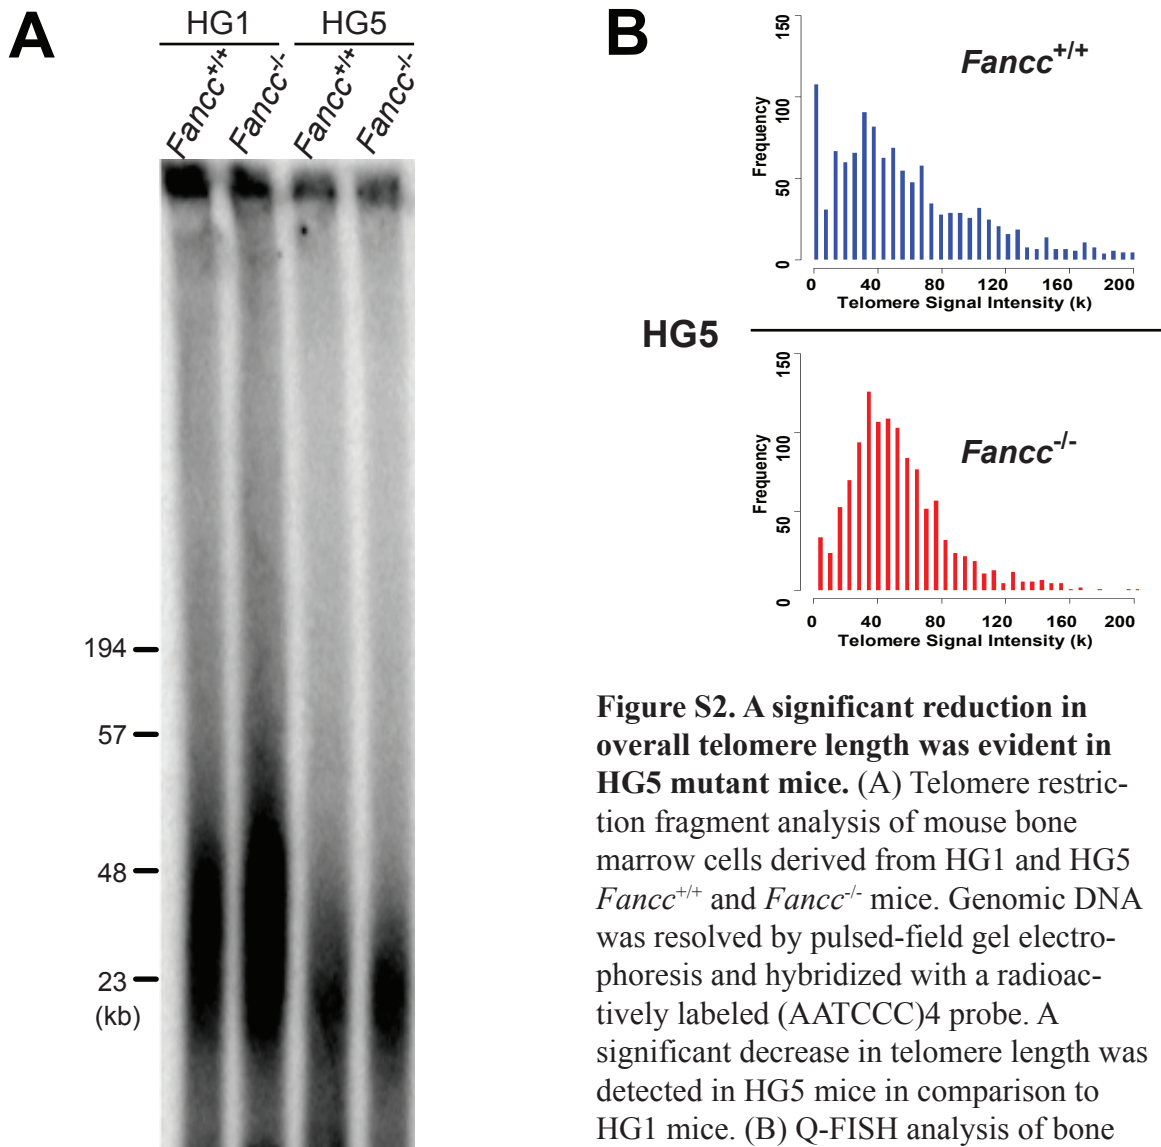

**Figure S2. A significant reduction in overall telomere length was evident in HG5 mutant mice.** (A) Telomere restriction fragment analysis of mouse bone marrow cells derived from HG1 and HG5 *Fancc*<sup>+/+</sup> and *Fancc*<sup>-/-</sup> mice. Genomic DNA was resolved by pulsed-field gel electrophoresis and hybridized with a radioactively labeled (AATCCC)<sub>4</sub> probe. A significant decrease in telomere length was detected in HG5 mice in comparison to HG1 mice. (B) Q-FISH analysis of bone marrow cells derived from HG5 *Tert*<sup>+/-</sup> *Fancc*<sup>+/+</sup> and *Tert*<sup>+/-</sup> *Fancc*<sup>-/-</sup>.

---

| Primer                    | Sequence                       |
|---------------------------|--------------------------------|
| <i>Tert</i> Forward       | 5'-TGGTGGAGGTTGTTGCCAA-3'      |
| <i>Tert</i> Reverse       | 5'-CCACTGCATACTGGCGGATAC-3'    |
| <i>Terc</i> Forward       | 5'-GTGGTGGCCATTTTTTGTCTAAC-3'  |
| <i>Terc</i> Reverse       | 5'-TGCTCTAGAATGAACGGTGGAA-3'   |
| <i>Beta-Actin</i> Forward | 5'-GACCTCTATGCCAACACAGTGCTG-3' |
| <i>Beta-Actin</i> Reverse | 5'-CACCGATCCACACAGAGTACTTGC-3' |

---

**Figure S3. Summary of primer sequences for qT-PCR analysis**
